# Supplementary material for: Trends in Utilization of Electronic Consultations Associated With Patient Payer and Language Among US Academic Medical Centers During the COVID-19 Pandemic
Source: PubMed Central journal article supplement (PMC9338406; doi:10.1001/jamanetworkopen.2022.24628), 2022-07-29
Supplement: jamanetwopen-e2224628-s001.pdf [file jamanetwopen-e2224628-s001.pdf]

## Supplemental Online Content

Arora A, Fekieta R, Nouri Z, et al. Trends in utilization of electronic consultations associated with patient payer and language among US academic medical centers during the COVID-19 pandemic. *JAMA Netw Open*. 2022;5(7):e2224628.  
doi:10.1001/jamanetworkopen.2022.24628

**eTable 1.** Specialties Included From 6 Academic Medical Centers

**eTable 2.** Completed eConsultations, Completed eConsultations and Referrals, and Percentage eConsultation Specialty Contact Before and During the Pandemic, Stratified by Patient Payer and Primary Language

**eTable 3.** Mean Monthly Volumes Before and During the Pandemic

**eTable 4.** Completed eConsultations, Completed eConsultations and Referrals, and Percentage eConsultation Specialty Contact, Before and During the Pandemic

**eFigure.** eConsultations and Referrals, and Primary Care Visits Over Time

**eTable 5.** Number of eConsultations and Referrals per 1000 Primary Care Visits Before and During the Pandemic

**eTable 6.** Percentage of Telehealth Visits in Primary Care

**eTable 7.** Full Interrupted Time-Series Models

This supplemental material has been provided by the authors to give readers additional information about their work.

**eTable 1.** Specialties Included From 6 Academic Medical Centers

|                      | <b>A</b> | <b>B</b> | <b>C</b> | <b>D</b> | <b>E</b> | <b>F</b> |
|----------------------|----------|----------|----------|----------|----------|----------|
| Allergy & Immunology |          | X        | X        | X        | X        |          |
| Cardiology           | X        | X        | X        | X        | X        | X        |
| Dermatology          |          |          | X        | X        | X        |          |
| Endocrinology        | X        | X        | X        | X        | X        | X        |
| ENT                  | X        |          | X        | X        |          |          |
| GI                   | X        | X        | X        | X        | X        |          |
| Hematology           |          | X        | X        | X        | X        |          |
| Hepatology           | X        | X        | X        | X        |          |          |
| Infectious Disease   | X        | X        | X        | X        | X        |          |
| Nephrology           | X        | X        | X        | X        | X        |          |
| Neurology            | X        | X        | X        | X        | X        | X        |
| Orthopedics          |          | X        |          | X        |          |          |
| Pulmonology          |          | X        | X        | X        | X        |          |
| Rheumatology         | X        | X        | X        | X        | X        |          |
| Urology              | X        | X        | X        | X        | X        |          |

Note. Medical and surgical specialties providing eConsults before May 20, 2019 were included.

**eTable 2.** Completed eConsultations, Completed eConsultations and Referrals, and Percentage eConsultation Specialty Contact Before and During the Pandemic, Stratified by Patient Payer and Primary Language

|                     |                              | Pre-pandemic<br>(6/4/2019 – 3/3/2020) |                                          |                                    | During pandemic<br>(3/4/2020 – 7/28/2020) |                                          |                                    |
|---------------------|------------------------------|---------------------------------------|------------------------------------------|------------------------------------|-------------------------------------------|------------------------------------------|------------------------------------|
|                     |                              | Numerator<br>(eConsults)              | Denominator<br>(eConsults<br>+referrals) | % eConsult<br>specialty<br>contact | Numerator<br>(eConsults)                  | Denominator<br>(eConsults<br>+referrals) | % eConsult<br>specialty<br>contact |
| Payer               | Medicare                     | 2,668                                 | 44,270                                   | 6.0%                               | 1,223                                     | 15,805                                   | 7.7%                               |
|                     | Medicaid                     | 616                                   | 12,197                                   | 5.1%                               | 314                                       | 5,034                                    | 6.2%                               |
|                     | Commercial                   | 5,859                                 | 86,398                                   | 6.8%                               | 2,989                                     | 32,007                                   | 9.3%                               |
|                     | Other                        | 465                                   | 3,738                                    | 12.4%                              | 280                                       | 1,624                                    | 17.2%                              |
|                     | Self-pay<br>and<br>uninsured | 96                                    | 2,070                                    | 4.6%                               | 35                                        | 1,032                                    | 3.4%                               |
| Primary<br>Language | English                      | 7,539                                 | 116,765                                  | 6.5%                               | 3,824                                     | 44,371                                   | 8.6%                               |
|                     | Non-English                  | 425                                   | 4,712                                    | 9.0%                               | 172                                       | 1,580                                    | 10.9%                              |

Notes. AMC A had 146 referrals with unknown payer type that were excluded from the payer analysis. Patient primary language for AMC D was unavailable.

**eTable 3.** Mean Monthly Volumes Before and During the Pandemic

| <b>Pre-Pandemic</b> | <b>Mean Monthly eConsults</b> | <b>Mean Monthly Referrals</b> | <b>Mean Monthly Primary Care Telehealth Visits</b> | <b>Mean Monthly Total Primary Care Visits</b> |
|---------------------|-------------------------------|-------------------------------|----------------------------------------------------|-----------------------------------------------|
| A                   | 158                           | 1,743                         | 108                                                | 19,486                                        |
| B                   | 203                           | 4,336                         | 0                                                  | 28,383                                        |
| C                   | 238                           | 3,425                         | 8                                                  | 23,583                                        |
| D                   | 193                           | 2,840                         | 118                                                | 8,810                                         |
| E                   | 257                           | 2,839                         | 225                                                | 39,302                                        |
| F                   | 29                            | 270                           | 13                                                 | 8,676                                         |
| Overall             | 1,078                         | 15,453                        | 472                                                | 128,240                                       |

| <b>During Pandemic</b> | <b>Mean Monthly eConsults</b> | <b>Mean Monthly Referrals</b> | <b>Mean Monthly Primary Care Telehealth Visits</b> | <b>Mean Monthly Total Primary Care Visits</b> |
|------------------------|-------------------------------|-------------------------------|----------------------------------------------------|-----------------------------------------------|
| A                      | 164                           | 1,349                         | 6,778                                              | 14,501                                        |
| B                      | 174                           | 3,083                         | 5,822                                              | 20,945                                        |
| C                      | 217                           | 2,024                         | 9,104                                              | 16,908                                        |
| D                      | 169                           | 1,749                         | 6,828                                              | 9,277                                         |
| E                      | 220                           | 1,787                         | 16,810                                             | 38,844                                        |
| F                      | 26                            | 149                           | 4,398                                              | 6,257                                         |
| Overall                | 968                           | 10,140                        | 49,740                                             | 106,732                                       |

*Note.* During the pandemic, there was a 33% decrease in mean monthly eConsults and referrals combined accompanied by a 17% decrease in mean monthly total primary care visits.

**eTable 4.** Completed eConsultations, Completed eConsultations and Referrals, and Percentage eConsultation Specialty Contact, Before and During the Pandemic

| Academic Medical Center | Pre-pandemic<br>(6/4/2019 – 3/3/2020) |                                                 |                              | During pandemic<br>(3/4/2020 – 7/28/2020) |                                                 |                              |
|-------------------------|---------------------------------------|-------------------------------------------------|------------------------------|-------------------------------------------|-------------------------------------------------|------------------------------|
|                         | Numerator<br>(completed eConsults)    | Denominator<br>(completed eConsults +referrals) | % eConsult specialty contact | Numerator<br>(completed eConsults)        | Denominator<br>(completed eConsults +referrals) | % eConsult specialty contact |
| A                       | 1,421                                 | 17,106                                          | 8.3%                         | 818                                       | 7,563                                           | 10.8%                        |
| B                       | 1,828                                 | 40,849                                          | 4.5%                         | 868                                       | 16,281                                          | 5.3%                         |
| C                       | 2,139                                 | 32,965                                          | 6.5%                         | 1,084                                     | 11,203                                          | 9.7%                         |
| D                       | 1,740                                 | 27,304                                          | 6.4%                         | 845                                       | 9,589                                           | 8.8%                         |
| E                       | 2,317                                 | 27,871                                          | 8.3%                         | 1,098                                     | 10,033                                          | 10.9%                        |
| F                       | 259                                   | 2,686                                           | 9.6%                         | 128                                       | 871                                             | 14.7%                        |

**eFigure.** eConsultations and Referrals, and Primary Care Visits Over Time

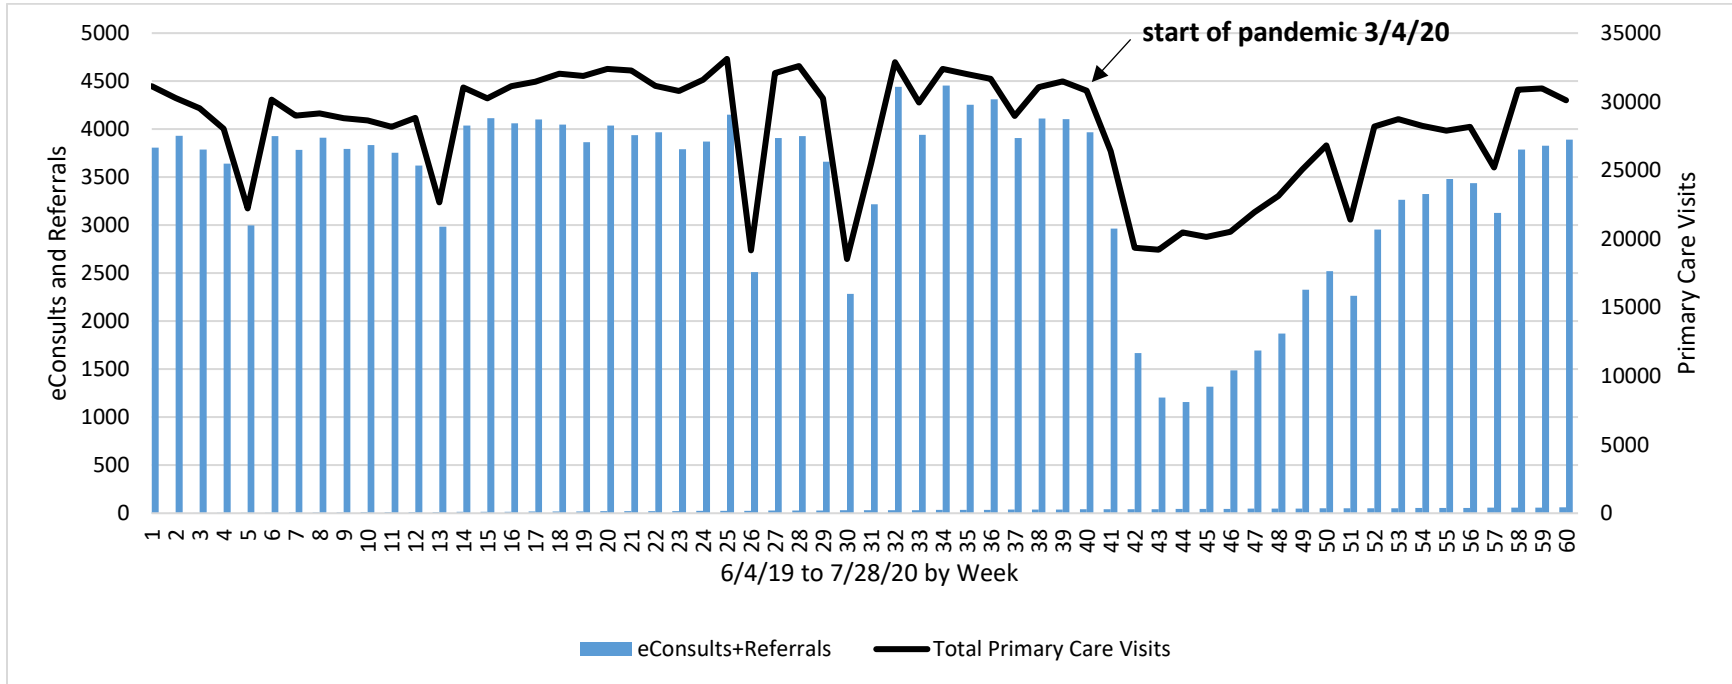

**eTable 5.** Number of eConsultations and Referrals per 1000 Primary Care Visits Before and During the Pandemic

|                         | <b>Pre-pandemic<br/>(6/4/2019 – 3/3/2020)</b> |                                   |                                               | <b>During pandemic<br/>(3/4/2020 – 7/28/2020)</b> |                                   |                                               |
|-------------------------|-----------------------------------------------|-----------------------------------|-----------------------------------------------|---------------------------------------------------|-----------------------------------|-----------------------------------------------|
| Academic Medical Center | Numerator (eConsults)                         | Denominator (primary care visits) | eConsults per 1,000 total primary care visits | Numerator (eConsults)                             | Denominator (primary care visits) | eConsults per 1,000 total primary care visits |
| A                       | 1,421                                         | 175,375                           | 8.1                                           | 818                                               | 72,505                            | 11.3                                          |
| B                       | 1,828                                         | 255,448                           | 7.2                                           | 868                                               | 104,724                           | 8.3                                           |
| C                       | 2,139                                         | 212,247                           | 10.1                                          | 1,084                                             | 84,540                            | 12.8                                          |
| D                       | 1,740                                         | 79,292                            | 21.9                                          | 845                                               | 46,386                            | 18.2                                          |
| E                       | 2,317                                         | 353,714                           | 6.6                                           | 1,098                                             | 194,218                           | 5.7                                           |
| F                       | 259                                           | 78,083                            | 3.3                                           | 128                                               | 31,287                            | 4.1                                           |
| Overall                 | 9,704                                         | 1,154,159                         | 8.4                                           | 4,841                                             | 533,660                           | 9.1                                           |

|                         | <b>Pre-pandemic<br/>(6/4/2019 – 3/3/2020)</b> |                                   |                                               | <b>During pandemic<br/>(3/4/2020 – 7/28/2020)</b> |                                   |                                               |
|-------------------------|-----------------------------------------------|-----------------------------------|-----------------------------------------------|---------------------------------------------------|-----------------------------------|-----------------------------------------------|
| Academic Medical Center | Numerator (referrals)                         | Denominator (primary care visits) | Referrals per 1,000 total primary care visits | Numerator (referrals)                             | Denominator (primary care visits) | Referrals per 1,000 total primary care visits |
| A                       | 15,685                                        | 175,375                           | 89.4                                          | 6,745                                             | 72,505                            | 93.0                                          |
| B                       | 39,021                                        | 255,448                           | 152.8                                         | 15,413                                            | 104,724                           | 147.2                                         |
| C                       | 30,826                                        | 212,247                           | 145.2                                         | 10,119                                            | 84,540                            | 119.7                                         |
| D                       | 25,564                                        | 79,292                            | 322.4                                         | 8,744                                             | 46,386                            | 188.5                                         |
| E                       | 25,554                                        | 353,714                           | 72.2                                          | 8,935                                             | 194,218                           | 46.0                                          |
| F                       | 2,427                                         | 78,083                            | 31.1                                          | 743                                               | 31,287                            | 23.7                                          |
| Overall                 | 139,077                                       | 1,154,159                         | 120.5                                         | 50,699                                            | 533,660                           | 95.0                                          |

**eTable 6.** Percentage of Telehealth Visits in Primary Care

|                            | <b>Pre-pandemic<br/>(6/4/2019 – 3/3/2020)</b> |                                         |                                           | <b>During pandemic<br/>(3/4/2020 – 7/28/2020)</b> |                                         |                                           |
|----------------------------|-----------------------------------------------|-----------------------------------------|-------------------------------------------|---------------------------------------------------|-----------------------------------------|-------------------------------------------|
|                            | Numerator<br>(telehealth<br>visits)           | Denominator<br>(primary care<br>visits) | % Telehealth<br>visits in primary<br>care | Numerator<br>(telehealth<br>visits)               | Denominator<br>(primary care<br>visits) | % Telehealth<br>visits in primary<br>care |
| Academic Medical<br>Center |                                               |                                         |                                           |                                                   |                                         |                                           |
| A                          | 975                                           | 175,375                                 | 0.6%                                      | 33,889                                            | 72,505                                  | 46.7%                                     |
| B                          | 0                                             | 255,448                                 | 0.0%                                      | 29,110                                            | 104,724                                 | 27.8%                                     |
| C                          | 75                                            | 212,247                                 | 0.04%                                     | 45,522                                            | 84,540                                  | 53.9%                                     |
| D                          | 1,064                                         | 79,292                                  | 1.3%                                      | 34,139                                            | 46,386                                  | 73.6%                                     |
| E                          | 20,21                                         | 353,714                                 | 0.6%                                      | 84,050                                            | 194,218                                 | 43.3%                                     |
| F                          | 117                                           | 78,083                                  | 0.2%                                      | 21,992                                            | 31,287                                  | 70.3%                                     |
| Overall                    | 4,252                                         | 1,154,159                               | 0.4%                                      | 248,702                                           | 533,660                                 | 46.6%                                     |



**eTable 7.** Full Interrupted Time-Series Models

|                                                                                | Model 1:<br>Overall<br>eConsult<br>Proportion | Model 2: eConsult<br>Proportion (Non-<br>English<br>languages) | Model 2:<br>eConsult<br>Proportion<br>(English only) | Model 3:<br>eConsult<br>Proportion<br>(Payer type=<br>Commercial) | Model 3:<br>eConsult<br>Proportion<br>(Payer type=<br>Medicaid) | Model 3:<br>eConsult<br>Proportion<br>(Payer<br>type=<br>Medicare) | Model 3:<br>eConsult<br>Proportion<br>(Payer<br>type=Other) | Model 3:<br>eConsult<br>Proportion<br>(Payer type=<br>Uninsured or<br>self-pay) |
|--------------------------------------------------------------------------------|-----------------------------------------------|----------------------------------------------------------------|------------------------------------------------------|-------------------------------------------------------------------|-----------------------------------------------------------------|--------------------------------------------------------------------|-------------------------------------------------------------|---------------------------------------------------------------------------------|
| Pre-Pandemic<br>Slope, %, (SE)                                                 | -0.00343 (-<br>0.71)                          | 0.0360 (1.52)                                                  | -0.00952 (-1.46)                                     | -0.00902 (-<br>1.32)                                              | 0.00920<br>(0.73)                                               | 0.00766<br>(1.53)                                                  | -0.0203 (-0.60)                                             | -0.0652*** (-<br>4.27)                                                          |
| First Week of<br>COVID, Change in<br>Intercept, %, (SE)                        | 6.206***<br>(10.05)                           | 8.481*** (6.35)                                                | 6.100*** (9.42)                                      | 6.938***<br>(9.99)                                                | 2.943***<br>(4.75)                                              | 5.870***<br>(8.84)                                                 | 8.941*** (7.18)                                             | -0.214 (-<br>0.38)                                                              |
| During and after<br>the 2nd Week of<br>COVID-19<br>Pandemic, slope,<br>%, (SE) | -0.29*** (-<br>0.04)                          | -0.54*** (-0.09)                                               | -0.28*** (-0.04)                                     | -0.31*** (-<br>0.05)                                              | -0.15** (-<br>0.04)                                             | -0.33*** (-<br>0.04)                                               | -0.28** (-0.09)                                             | 0.02 (-0.04)                                                                    |
| Change in Slope<br>%, (SE)                                                     | -0.296*** (-<br>6.41)                         | -0.576*** (-5.80)                                              | -0.272*** (-<br>5.68)                                | -0.306*** (-<br>5.92)                                             | -0.162** (-<br>2.97)                                            | -0.340*** (-<br>7.10)                                              | -0.265* (-2.41)                                             | 0.0866 (1.86)                                                                   |
| Intercept %, (SE)                                                              | 6.596***<br>(67.82)                           | 8.348*** (15.82)                                               | 6.643*** (51.34)                                     | 6.945***<br>(50.41)                                               | 4.949***<br>(18.75)                                             | 5.923***<br>(55.62)                                                | 12.84*** (19.38)                                            | 6.083***<br>(17.71)                                                             |
| N                                                                              | 60                                            | 60                                                             | 60                                                   | 60                                                                | 60                                                              | 60                                                                 | 60                                                          | 60                                                                              |
| P-Value                                                                        | * p<0.05, ** p<0.01, *** p<0.001"             |                                                                |                                                      |                                                                   |                                                                 |                                                                    |                                                             |                                                                                 |
